# Supplementary material
Source: Research Square preprint supplement (doi:10.21203/rs.3.rs-8650732/v1)
Supplement: Supplementary file 1 [file 8e0d9970c79d7f4f2a275f85.docx]

**Supplementary data**

Table S1: Summary of the two-way ANOVA for MeJa elicitation and Pyr addition on IC AQ production (µmol/g FW) in hairy root cultures of *R. tinctorum*.

| Source of Variation | Sum of Squares | df | MS | F-Ratio | p-Value |
| --- | --- | --- | --- | --- | --- |
| Model | 163.95 | 3 | 54.65 | 55.47 | <0.0001 |
| Pyr | 6.65 | 1 | 6.65 | 6.75 | 0.0317 |
| MeJa | 156.6 | 1 | 156.6 | 158.94 | <0.0001 |
| Pyr*MeJa | 0.69 | 1 | 0.69 | 0.71 | 0.4254 |
| Error | 7.88 | 8 | 0.99 |  |  |
| Total | 171.83 | 11 |  |  |  |

Table S2: Summary of the main and interaction effects of two-way ANOVA for MeJa elicitation and Pyr addition on EC AQ accumulation (µM) in hairy root cultures of *R. tinctorum*.

| Source of Variation | Sum of Squares | df | MS | F-Ratio | p-Value |
| --- | --- | --- | --- | --- | --- |
| Model | 2148.33 | 3 | 716.11 | 39.52 | <0.0001 |
| Pyr | 907.41 | 1 | 907.41 | 50.08 | <0.0001 |
| MeJa | 1128.5 | 1 | 1128.5 | 62.28 | <0.0001 |
| Pyr*MeJa | 112.42 | 1 | 112.42 | 6.2 | 0.0375 |
| Error | 144.97 | 8 | 18.12 |  |  |
| Total | 2293.3 | 11 |  |  |  |

Figure S1: Interaction plot for EC AQs (expressed as μmol/L) released by hairy roots of *R. tinctorum* in a 22 full factorial experiment combining MeJa elicitation and Pyr feeding. A: Effects of Pyr at each level of MeJa; B: Effects of MeJa at each level of Pyr;.

Table S3: Summary of the main and interaction effects of three-way ANOVA for MeJa elicitation and Pyr and KG addition on IC AQ accumulation (µmol/gFW) in hairy root cultures of *R. tinctorum*.

| Source of variation | Sum of Squares | df | MS | F-Ratio | p Value |
| --- | --- | --- | --- | --- | --- |
| Model | 210.56 | 7 | 30.08 | 54.58 | <0.0001 |
| Pyr | 4.10 | 1 | 4.10 | 7.44 | <0.0149 |
| KG | 7.94 | 1 | 7.94 | 14.41 | <0.0016 |
| MeJa | 196.06 | 1 | 196.06 | 355.76 | <0.0001 |
| Pyr*KG | 1.6E-3 | 1 | 1.6E-3 | 2.9E-3 | 0.9575 |
| Pyr*MeJa | 0.06 | 1 | 0.06 | 0.11 | 0.7451 |
| KG*MeJa | 1.62 | 1 | 1.62 | 2.95 | 0.1053 |
| Pyr*KG*MeJa | 0.77 | 1 | 0.77 | 1.40 | 0.2542 |
| Error | 8.82 | 16 | 0.55 |  |  |
| Total | 219.38 | 23 |  |  |  |

Table S4: Three-way ANOVA for total AQs (μmol/L) after MeJa elicitation and Pyr and KG addition produced by hairy root cultures of *R. tinctorum*.

| **Source of variation** | **Sum of Squares** | **df** | **MS** | **F-Ratio** | **p-Value** |
| --- | --- | --- | --- | --- | --- |
| Model | 1763815.40 | 7 | 251973.63 | 52.25 | <0.0001 |
| Pyr | 41460.26 | 1 | 41460.26 | 8.60 | <0.0098 |
| KG | 84210.85 | 1 | 84210.85 | 17.46 | <0.0007 |
| MeJa | 1609881.84 | 1 | 1609881.84 | 333.80 | <0.0001 |
| Pyr*KG | 49.82 | 1 | 49.82 | 0.01 | 0.9203 |
| Pyr*MeJa | 1691.76 | 1 | 1691.76 | 0.35 | 0.5619 |
| KG*MeJa | 1476.74 | 1 | 1476.74 | 0.31 | 0.5877 |
| Pyr*KG*MeJa | 25044.13 | 1 | 25044.13 | 5.19 | 0.0367 |
| Error | 77165.73 | 16 | 4822.86 |  |  |
| Total | 1840981.12 | 23 |  |  |  |

Figure S2: Interaction plot for total AQs (expressed as μmol/L) produced by hairy roots of *R. tinctorum* in a 32 full factorial experiment combining MeJa elicitation and Pyr and KG feeding.

Table S5: Summary of the main and interaction effects of three-way ANOVA for MeJa elicitation and Pyr and KG addition on EC AQ accumulation (µmol/L) in hairy root cultures of *R. tinctorum*

| Source of variation | Sum of Squares | df | MS | F-Ratio | p-Value |
| --- | --- | --- | --- | --- | --- |
| Model | 4565.57 | 7 | 652.22 | 21.41 | <0.0001 |
| Pyr | 180.35 | 1 | 180.35 | 5.92 | 0.0271 |
| KG | 2928.47 | 1 | 2928.47 | 96.13 | <0.0001 |
| MeJa | 694.13 | 1 | 694.13 | 22.79 | 0.0002 |
| Pyr*KG | 314.58 | 1 | 314.58 | 10.33 | 0.0054 |
| Pyr*MeJa | 269.14 | 1 | 269.14 | 8.83 | 0.0090 |
| KG*MeJa | 168.70 | 1 | 168.70 | 5.54 | 0.0317 |
| Pyr*KG*MeJa | 10.21 | 1 | 10.21 | 0.33 | 0.5708 |
| Error | 487.42 | 16 | 30.5 |  |  |
| Total | 5052.99 | 23 |  |  |  |

Table S6. Summary of the main and interaction effects of three-way ANOVA for MeJa elicitation and Pyr and KG addition on specific production of TP (expressed as mg/g FW) in hairy root cultures of *R. tinctorum*.

| Source of variation | Sum of Squares | df | MS | F-Ratio | p-Value |
| --- | --- | --- | --- | --- | --- |
| Model | 0.44 | 7.00 | 0.06 | 1.25 | 0.33 |
| Pyr | 0.00 | 1.00 | 0.00 | 0.03 | 0.87 |
| KG | 0.08 | 1.00 | 0.08 | 1.50 | 0.24 |
| MeJa | 0.21 | 1.00 | 0.21 | 4.16 | 0.06 |
| Pyr*KG | 0.00 | 1.00 | 0.00 | 0.05 | 0.82 |
| Pyr*MeJa | 0.01 | 1.00 | 0.01 | 0.21 | 0.65 |
| KG*MeJa | 0.14 | 1.00 | 0.14 | 2.75 | 0.12 |
| Pyr*KG*MeJa | 0.00 | 1.00 | 0.00 | 0.07 | 0.80 |
| Error | 0.81 | 16.00 | 0.05 |  |  |
| Total | 1.26 | 23.00 |  |  |  |

Table S7. Summary of the main and interaction effects of three-way ANOVA for MeJa elicitation and Pyr and KG addition on volumetric production of TP (expressed as mg/L) in hairy root cultures of *R. tinctorum.*

| **Source of variation** | **Sum of squares** | **df** | **MS** | **F-Ratio** | **p-Value** |
| --- | --- | --- | --- | --- | --- |
| Model | 3285.133 | 7 | 469.305 | 0.740 | 0.642 |
| Pyr | 1.170 | 1 | 1.170 | 0.002 | 0.966 |
| KG | 519.870 | 1 | 519.870 | 0.820 | 0.379 |
| MeJa | 1253.971 | 1 | 1253.971 | 1.977 | 0.179 |
| Pyr*KG | 73.360 | 1 | 73.360 | 0.116 | 0.738 |
| Pyr*MeJa | 139.491 | 1 | 139.491 | 0.220 | 0.645 |
| KG*MeJa | 1165.105 | 1 | 1165.105 | 1.837 | 0.194 |
| Pyr*KG*MeJa | 132.164 | 1 | 132.164 | 0.208 | 0.654 |
| Error | 10147.205 | 16 | 634.200 |  |  |
| Total | 13432.337 | 23 |  |  |  |

Table S8. Summary of the main and interaction effects of three-way ANOVA for MeJa elicitation and Pyr and KG addition on the specific production of TF (expressed as mg/g FW) in hairy root cultures of *R. tinctorum*.

| **Source of variation** | **Sum of squares** | **df** | **MC** | **F-ratio** | **p-value** |
| --- | --- | --- | --- | --- | --- |
| Model | 66.964926 | 7 | 9.5664181 | 47.894134 | <0.0001 |
| Pyr | 0.0061845 | 1 | 0.0061845 | 0.0309624 | 0.862 |
| KG | 0.1966859 | 1 | 0.1966859 | 0.984705 | 0.336 |
| MeJa | 66.471973 | 1 | 66.471973 | 332.79098 | <0.0001 |
| Pyr*KG | 0.0516562 | 1 | 0.0516562 | 0.2586162 | 0.618 |
| Pyr*MeJa | 0.0536442 | 1 | 0.0536442 | 0.2685691 | 0.611 |
| KG*MeJa | 1.054E-05 | 1 | 1.054E-05 | 5.279E-05 | 0.994 |
| Pyr*KG*MeJa | 0.0497177 | 1 | 0.0497177 | 0.2489111 | 0.625 |
| Error | 2.9961137 | 15 | 0.1997409 |  |  |
| Total | 69.96104 | 22 |  |  |  |

Table S9. Summary of the main and interaction effects of three-way ANOVA for MeJa elicitation and Pyr and KG addition on the volumetric production of TF (expressed as mg/L) in hairy root cultures of *R. tinctorum.*

| **Source of variation** | **Sum of squares** | **df** | **MC** | **F-ratio** | **p-value** |
| --- | --- | --- | --- | --- | --- |
| Model | 634331.25 | 7 | 90618.8 | 74.22 | <0.0001 |
| Pyr | 284.33 | 1 | 284.3 | 0.23 | 0.636 |
| KG | 5211.64 | 1 | 5211.6 | 4.27 | 0.565 |
| MeJa | 624364.59 | 1 | 624364.6 | 511.39 | <0.0001 |
| Pyr*KG | 154.41 | 1 | 154.4 | 0.13 | 0.727 |
| Pyr*MeJa | 1456.96 | 1 | 1457.0 | 1.19 | 0.292 |
| KG*MeJa | 1560.01 | 1 | 1560.0 | 1.28 | 0.276 |
| Pyr*KG*MeJa | 1987.94 | 1 | 1987.9 | 1.63 | 0.221 |
| Error | 18313.59 | 15 | 1220.9 |  |  |
| Total | 652644.85 | 22 |  |  |  |
